# Supplementary material
Source: publisher figshare collection journal article supplement (https://acs.figshare.com/ndownloader/files/3783250)
Supplement: Supplementary file 1 [file 3783250]

# Supporting Information

## Nonlinear Optical Investigations in Nine-Atom Silver Quantum Clusters and Graphitic Carbon Nitride Nanosheets

*Kishore Sridharan<sup>†</sup>, P. Sreekanth<sup>‡</sup>, Tae Joo Park<sup>†</sup>, and Reji Philip<sup>\*,‡</sup>*

<sup>†</sup>Department of Materials Science and Engineering, Hanyang University, Ansan 426-791, Republic of Korea

<sup>‡</sup>Ultrafast and Nonlinear Optics Lab, Light and Matter Physics Group, Raman Research Institute, Bangalore 560080, India

\*Corresponding author

Email: [reji@rri.res.in](mailto:reji@rri.res.in)

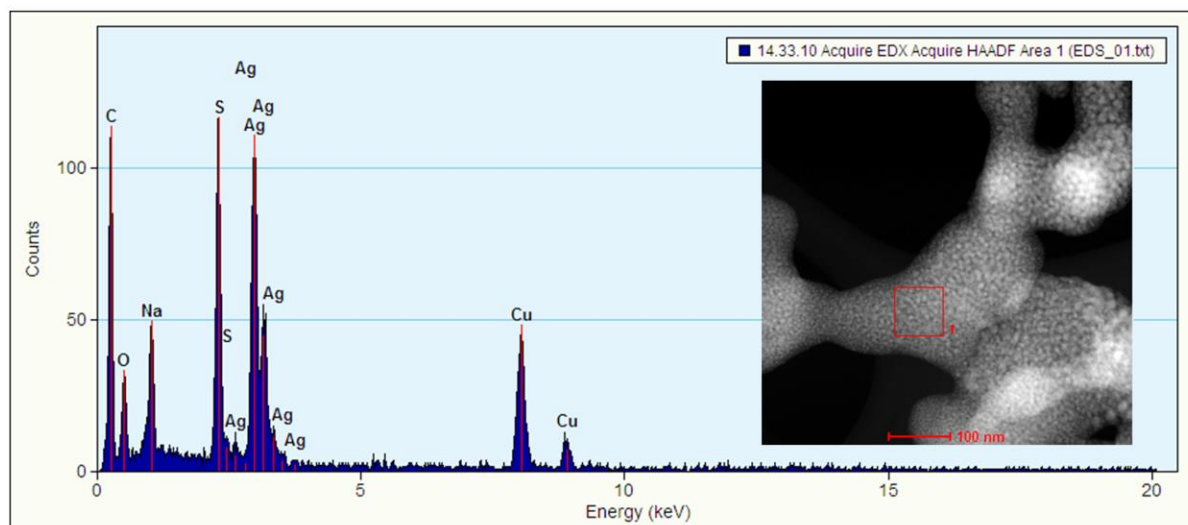

**Figure S1.** Energy dispersive X-ray spectra obtained from the area marked in the HAADF-STEM image shown in the inset. The presence of the elemental peaks from Ag, S, and Na confirm the formation of Ag<sub>9</sub> QCs. Cu peaks correspond to the substrate.

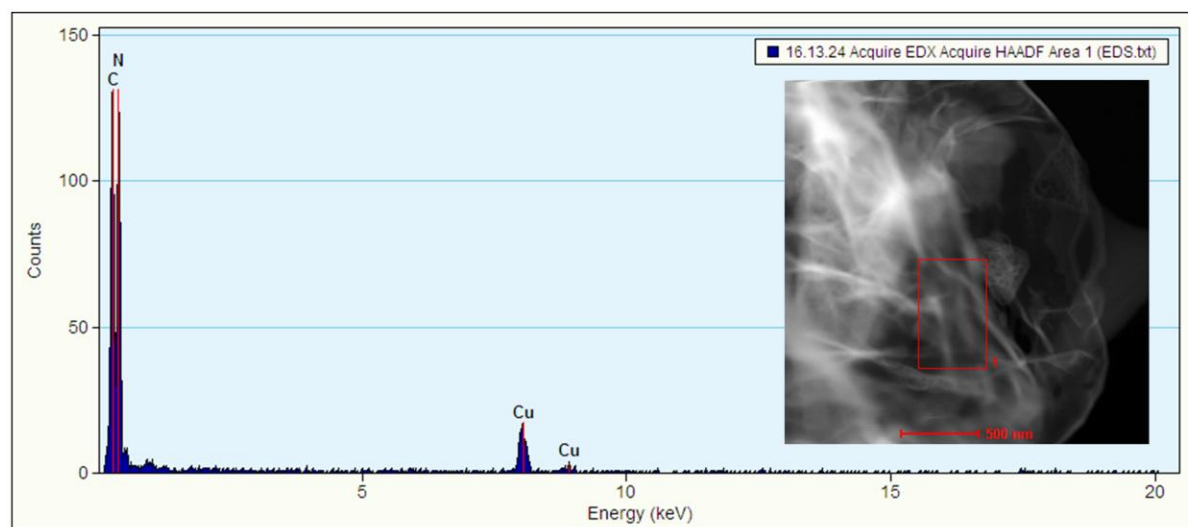

**Figure S2.** Energy dispersive X-ray spectra obtained from the area marked in the HAADF-STEM image shown in the inset. The presence of the elemental peaks from C and N confirm the formation of GCN. Cu peaks correspond to the substrate.

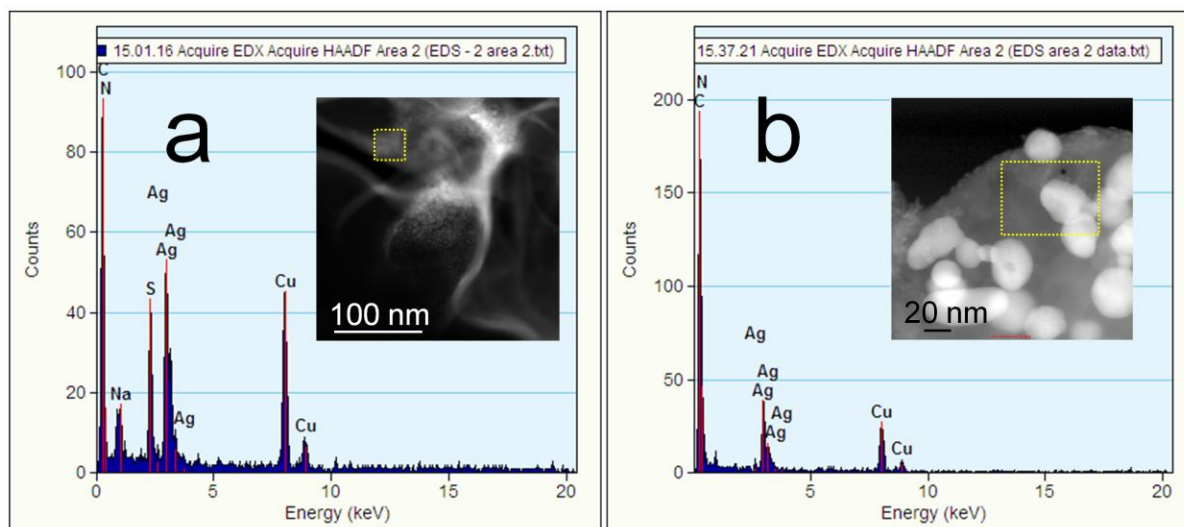

**Figure S3.** Energy dispersive X-ray spectra of (a) Ag<sub>9</sub> QCs-GCN and (b) Ag NPs-GCN, obtained from the area marked in the HAADF-STEM image shown in the insets. In both (a) and (b), the presence of the elemental peaks from C and N confirm the formation of GCN. The presence of elemental peaks from Ag, Na and S confirm the formation of Ag<sub>9</sub> QCs (a), while the Ag peaks confirm the formation of Ag NPs (b). Cu peaks correspond to the substrate.

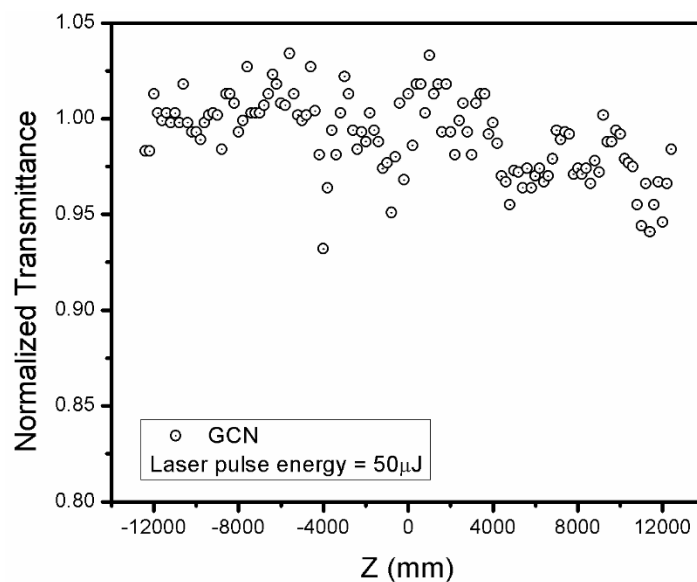

**Figure S4.** Open aperture Z-scan data of GCN measured using 5 ns laser pulses at 532 nm, at the input laser pulse energy of 50  $\mu$ J.

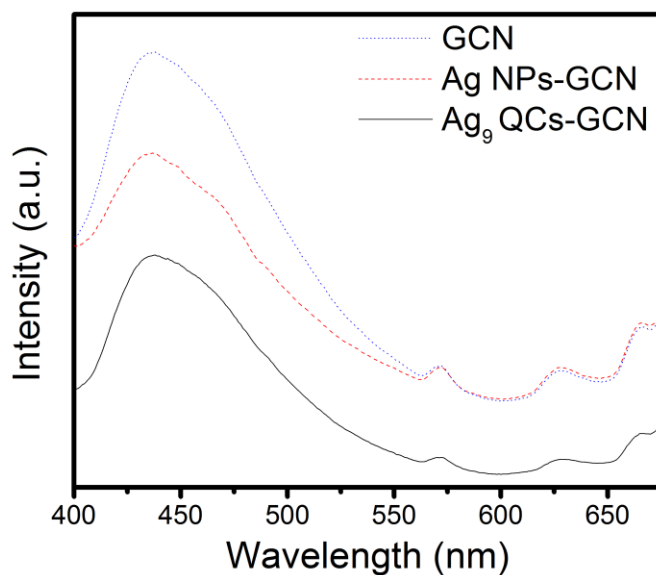

**Figure S5.** Photoluminescence spectra of GCN, Ag NPs-GCN and Ag<sub>9</sub> QCs-GCN excited at 350 nm. The significant reduction in the PL intensity for Ag<sub>9</sub> QCs-GCN indicates that electrons are effectively transferred from GCN to Ag<sub>9</sub> QCs.
